# Supplementary material
Source: PubMed Central journal article supplement (PMC7044055)

**Supplemental 1:** (A) Changes in extracellular pH.  $1 \times 10^6$  PMN were plated on 3.0  $\mu\text{M}$  pore inserts in the presence or absence of fMLP and the extracellular pH was recorded

every minute for 400 min. Data are expressed as pH (n=3). (B) Lactate detected in the supernatant from  $1 \times 10^6$  PMN in the presence or absence of fMLP (n=3). n=number of independent experiments performed, separate passages of cells were used for each experiment. The data for each experiment was pooled and expressed as the mean  $\pm$  SEM and p-value determined by ANOVA or T-test, \*\*\*p<0.0001

**Supplemental 2:** (A) Luciferase promoter assay in T84 and Caco2 IECs treated in combination with 100  $\mu$ M Ado and 1 $\mu$ M of the Ado A2B receptor inhibitor PSB-603 (n=3). (B) Representative western blot and densitometry analysis of SLC26A3 expression following 24 hr 100  $\mu$ M Ado treatment in T84 IECs pretreated with Erk inhibitor (n=3). n=number of independent experiments performed, separate passages of cells were used for each experiment. The data for each experiment was pooled and expressed as the mean  $\pm$  SEM and p-value determined by ANOVA or T-test, \* p< 0.01, \*\*\*p<0.0001,

**Supplemental 3:** (A) Primer design for site-directed mutagenesis of each CREB site within the SLC26A3 promoter. (B) Sanger sequencing results confirming mutation within the selected CREB sites. (C) Analysis of SLC26A3 promoter activity in CREB mutants in T84 and Caco2 cells treated 100  $\mu$ M Ado (n=3). n=number of independent experiments performed, separate passages of cells were used for each experiment. The data for each experiment was pooled and expressed as the mean  $\pm$  SEM and p-value determined by ANOVA or T-test, \* p< 0.01

**Supplemental 4:** Tissue homeostasis and Isc when treated with Ado or forskolin. (A) Basal to apical fluid flux in T84 VC, OE, and KD IECs induced by 24 hr 100  $\mu$ M Ado (n=3). (B) Basal to apical fluid flux in T84 VC, OE, and KD IECs induced by 24 hr 10  $\mu$ M forskolin treatment (n=3). (C) Peak Isc in T84 VC, OE, and KD IECs treated apically with 10 or 100  $\mu$ M Ado (n=3). (D) Peak Isc in T84 VC, OE, and KD IECs treated basally with 10 or 100  $\mu$ M Ado (n=3). (E) Intracellular pH following treatment with 10  $\mu$ M forskolin (n=3). (F) qPCR quantification of SLC26A3, cFOS, NR4A2, and NR4A3 expression following a 3 hr treatment with 10  $\mu$ M forskolin (n=3). n=number of independent experiments performed, separate passages of cells were used for each experiment. The data for each experiment was pooled and expressed as the mean  $\pm$  SEM and p-value determined by ANOVA or T-test, \* p<0.01, \*\*\* p<0.0001

A

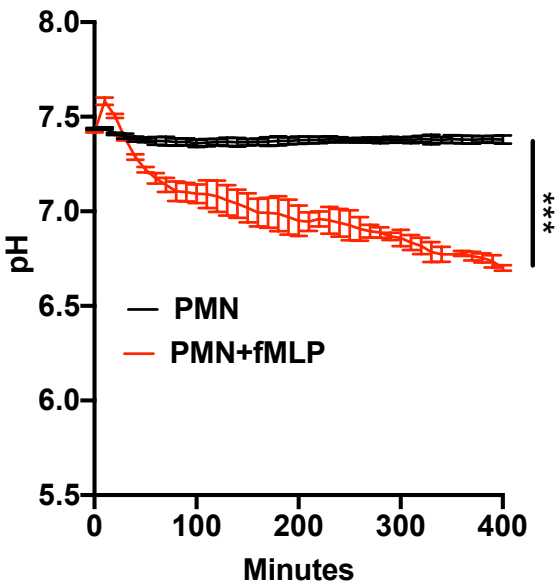

B

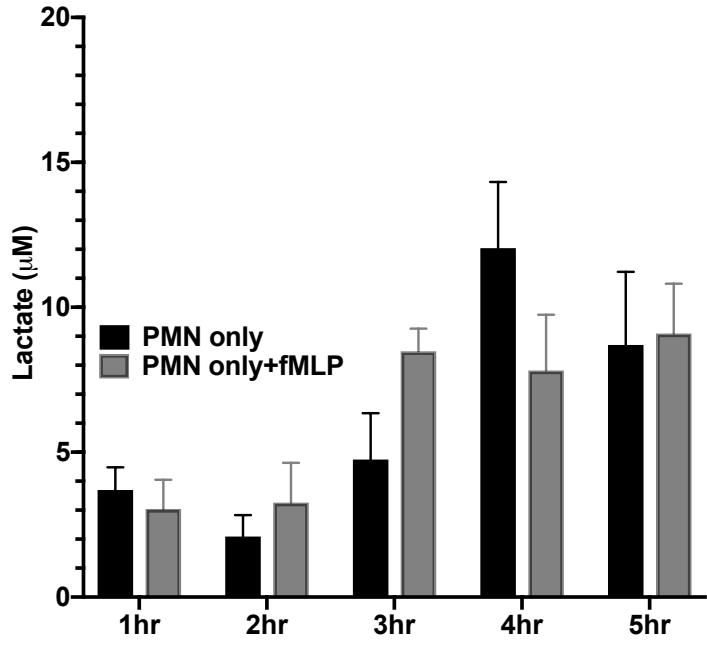

A

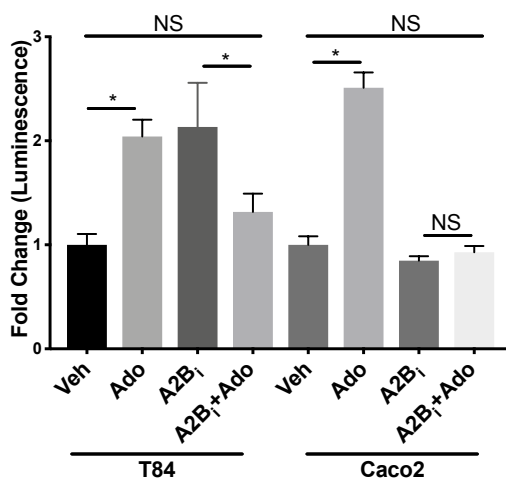

B

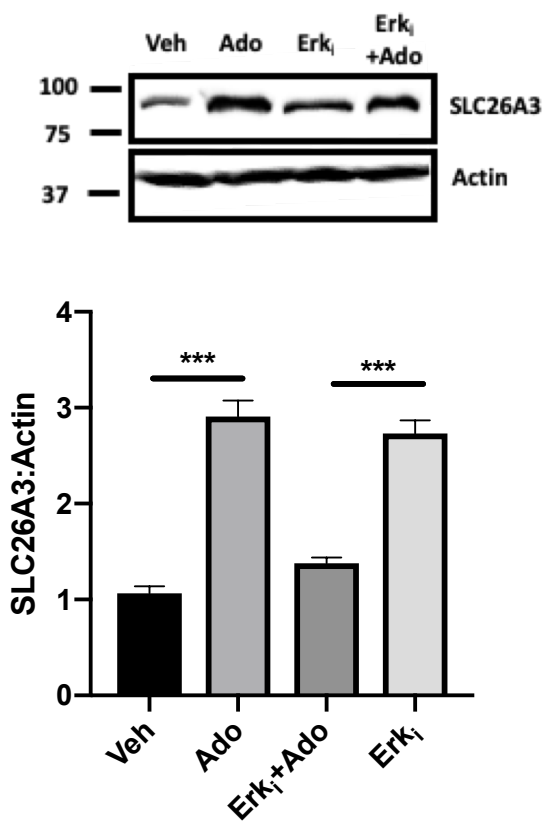

**A**

| Creb Site | Primer Direction | Primer Sequence                                                             |
|-----------|------------------|-----------------------------------------------------------------------------|
| CREB1     | Forward          | 5'-ctaaaaaaaaattttaacacactgtttttcaccagcccttttgccaatttctctctaactctttctttg-3' |
|           | Reverse          | 5'-caaagaaagagtagaggagaaattggcaaaaaggctgggtgaaaacaagtggttaaaaaatttttttag-3' |
| CREB2     | Forward          | 5'-cacaatgaatacttcaactctcatccgattaaaagcattggcattgctgactacacttc-3'           |
|           | Reverse          | 5'-gaaagtgtagtcagcaatgccaaatgctttaatgcggatgagagtgaaagtattcattg-3'           |
| CREB3     | Forward          | 5'-ttaatgcactgtgtgtacacgctttcattggttcagagattgcacagcagatgct-3'               |
|           | Reverse          | 5'-agcatctgctgtcaatctctgcaaaccaatgaaagcgtgtacacacaagtcattaa-3'              |
| CREB4     | Forward          | 5'-tgcatagggatgtctatatataggctatacgcgacagtggacaaattacctttctgtag-3'           |
|           | Reverse          | 5'-ctgacagaaagtaattgtccactgtcgtatagcctatatatagacatccctatgca-3'              |
| CREB5     | Forward          | 5'-gtttgcagagattgcacagcagatgccagtgacttaaaaaaaaaaagaatcttctcaag-3'           |
|           | Reverse          | 5'-cttgagaagattcttttttttaagtacactggcatctgctgcaatctctgcaaac-3'               |

**B**

**CREB1**

WT 61 GTTAGAGGAGAAATTGGCAAAAAGGATGAGGTGAAAAACAAGTGTGTTAAAAAAtttttt 119  
 |||  
 Mut 122 GTTAGAGGAGAAATTGGCAAAAAGGGCTGGGTGAAAAACAAGTGTGTTAAAAAATTTTTT 180

**CREB2**

WT 301 AAGAGGAGTTCATGAAAGTGTAGTCAGCAATGCCAAATGCTTTTAAGTAAGATGAGAGTT 360  
 |||  
 Mut 361 AAGAGGAGTTCATGAAAGTGTAGTCAGCAATGCCAAATGCTTTTAATGCGGATGAGAGTT 420

**CREB3**

WT 661 TGCTGTGCAATCTCTGCAAACCAATGAAATTACGTACACACAAGTGCATTAAACCACCCA 720  
 |||  
 Mut 726 TGCTGTGCAATCTCTGCAAACCAATGAAAGCGTGTACACACAAGTGCATTAAACCACCCA 785

**CREB4**

WT 841 GTTAATTATTTAAAGCTGACAGAAAGGTAATTTGTCCTACTGTCTTACATAGCCTATATATA 900  
 |||  
 Mut 901 GTTAATTATTTAAAGCTGACAGAAAGGTAATTTGTCCTACTGTCTGCGTATAGCCTATATATA 960

**CREB5**

WT 601 AAATGTCAAGGAGATAACCCCTTGAGAAGATTCtttttttttttAAGTACACGTGAGCAT 659  
 |||  
 Mut 659 AAATGTCAAGGAGATAACCCCTTGAGAAGATTCTTTTTTTTTTAAGTACACTGTGGCAT 717

**C**

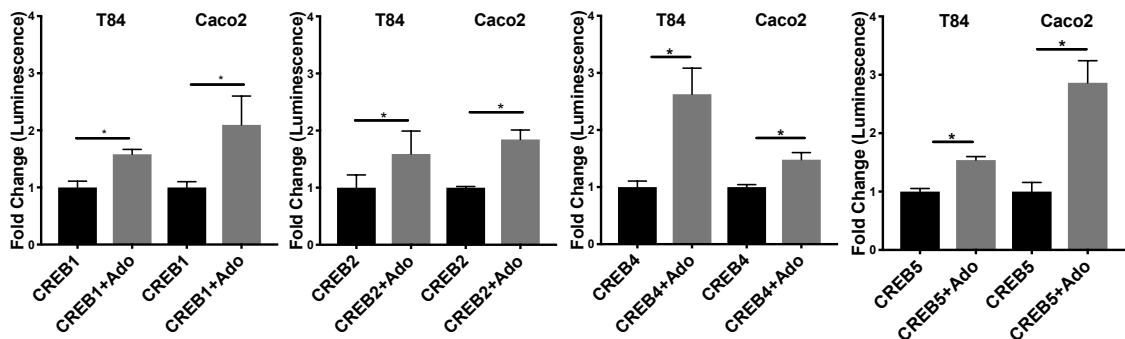

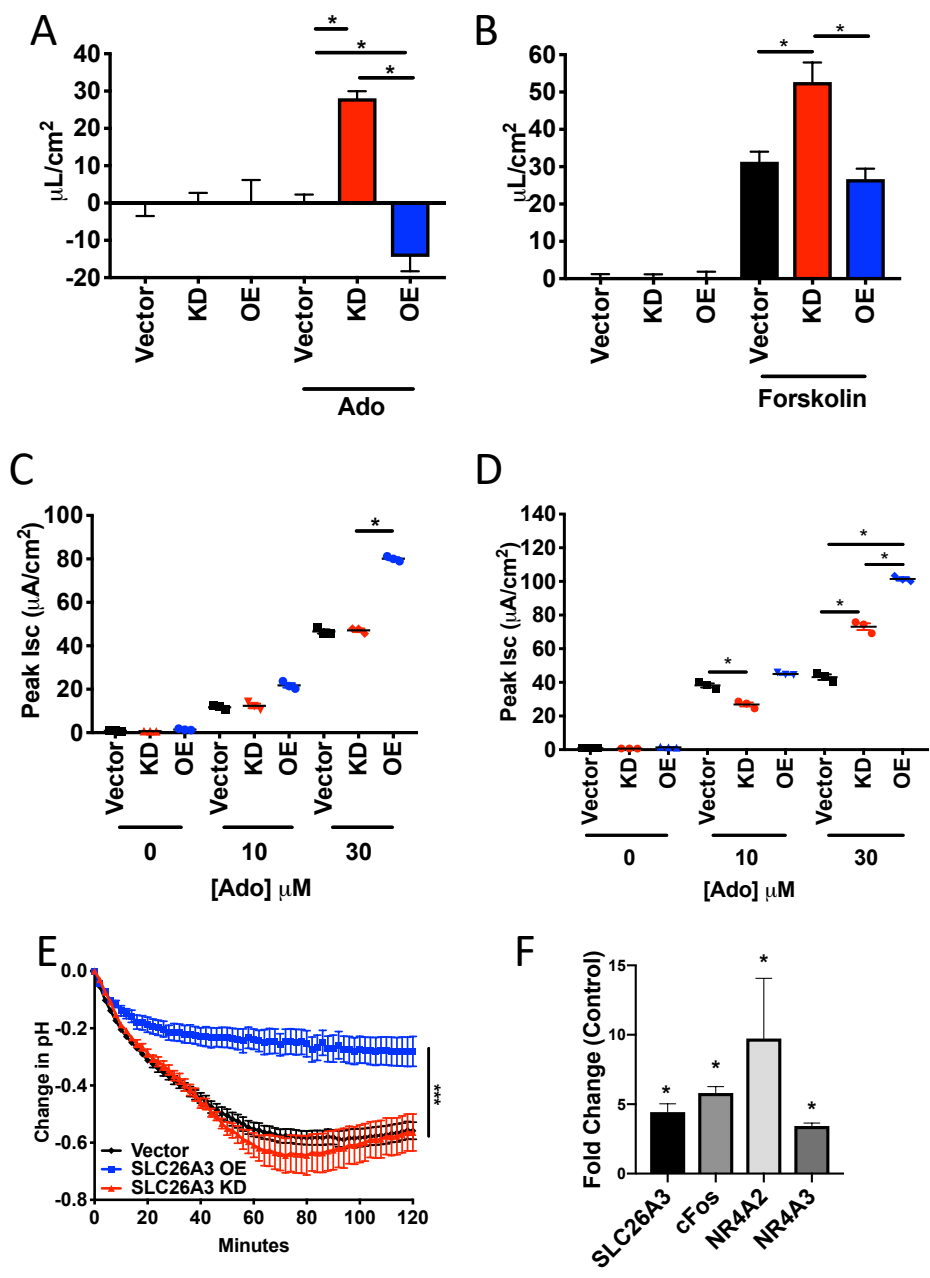

Supplement: NIHMS1543192-supplement-1.pdf [file NIHMS1543192-supplement-1.pdf]
